# Supplementary material for: Effect of Ripening on the Phenolic Composition and Mineral Content of Three Varieties of Olive Fruits
Source: Foods. 2021 Feb 9;10(2):380. doi: 10.3390/foods10020380 (PMC7919262; doi:10.3390/foods10020380)

# **Effect of Ripening on the Phenolic Composition and Mineral Content of Three Varieties of Spanish Olive Fruits**

**María del Pilar Fernández-Poyatos, Eulogio J. Llorent-Martínez and Antonio Ruiz-Medina\***

Department of Physical and Analytical Chemistry, Faculty of Experimental Sciences, University of  
Jaén, Campus Las Lagunillas, E-23071 Jaén, Spain

\*Correspondence: [anruiz@ujaen.es](mailto:anruiz@ujaen.es); Tel.: +34 953 212759

## **Supplementary Material**

## Chromatographic Conditions

Chromatographic conditions are based on previous work by our research group [1]. In these analyses, 5 mg of DE were re-dissolved in 1 mL of MeOH:H<sub>2</sub>O (80:20; v:v), filtered through 0.45  $\mu$ m filters, and 10  $\mu$ L of sample was analyzed. The HPLC system was an Agilent Series 1100, composed of a vacuum degasser, an autosampler, a binary pump and a G1315B diode array detector (Agilent Technologies; Santa Clara, CA, USA). We used a reversed phase Luna Omega Polar C18 analytical column of 150 x 3.0 mm and 5  $\mu$ m particle size (Phenomenex; Torrance, CA, USA) and a Polar C18 Security Guard cartridge (Phenomenex) of 4 x 3.0 mm. The best separation was achieved with a mobile phase of H<sub>2</sub>O:HCOOH (100:0.1, v/v) and CH<sub>3</sub>CN. The following program was used: a) initial mobile phase, 10% CH<sub>3</sub>CN; b) linear increase from 10% to 25% CH<sub>3</sub>CN (0-25 min); c) 25% CH<sub>3</sub>CN (25-30 min); d) linear increase from 25% to 50% CH<sub>3</sub>CN (30-40 min); e) linear increase from 50% to 100% CH<sub>3</sub>CN (40-42 min); f) 100% CH<sub>3</sub>CN (42-47 min). Then, CH<sub>3</sub>CN percentage was returned to the initial mobile phase, with a 7 min stabilization time. The flow rate was 0.4 ml min<sup>-1</sup>.

The HPLC system was connected to an ion trap mass spectrometer (Esquire 6000, Bruker Daltonics, Billerica, MA, USA) equipped with an electrospray interface. The scan range was at m/z 100–1200 with a speed of 13,000 Da/s. The ESI conditions were: drying gas (N<sub>2</sub>) flow rate and temperature, 10 L/min and 365 °C, respectively; nebulizer gas (N<sub>2</sub>) pressure, 50 psi; capillary voltage, 4500 V; capillary exit voltage, -117.3 V. We used the auto MS<sup>n</sup> mode for the acquisition of MS<sup>n</sup> data, with isolation width of 4.0 m/z, and fragmentation amplitude of 0.6 V (MS<sup>n</sup> up to MS<sup>4</sup>). The negative ion mode was used in all cases.

Calibration curves for hydroxytyrosol, luteolin, oleuropein, oleoside-11-methylester, rutin and verbascoside were prepared in the range of 0.5–100  $\mu$ g mL<sup>-1</sup>. Chromatograms were recorded at 240, 280 and 350 nm for secoiridoids, hydroxytyrosol and luteolin, respectively. For oleoside-11-methylester, oleuropein, rutin and verbascoside, the instrument was operated in product ion scan

MS/MS mode with MS/MS transitions 403→223, 539→377, 609→301 and 623→461, respectively, and voltage amplitudes between 0.4 and 0.7 V.

### ICP-MS Characteristics

ICP-MS conditions are based on previous work by our research group [1]. An Agilent 7900 (Agilent Technologies, CA, USA) equipped with a Peltier-cooled quartz spray chamber (Scott type), a quartz torch (2.5 mm i.d.), a low flow concentric nebulizer (0.2 mL/min) and high efficiency “MicroMist”, were used. The instrument is equipped with a discrete sampling system (ISIS3), an autosampler (SPS4), a sample introduction system (UHMI), ion lenses off-axis, a high-frequency quadrupole (3 MHz), a radiofrequency generator (27 MHz), an octopolar collision-reaction cell (ORS system), and a secondary electron multiplier detector. The following solutions were also used: 100  $\mu\text{g mL}^{-1}$  multi-element standard (SCP Science, Paris, France), 1000  $\mu\text{g mL}^{-1}$  P solution (Sigma-Aldrich), 1000  $\mu\text{g mL}^{-1}$  Sn (High-Purity Standards, Charleston, SC, USA) and an internal standard kit (Sc, Ge, Rh and Ir) from ISC Science (Oviedo, Spain).

We studied the inorganic content of Cornezuelo, Cornicabra and Picual olives by ICP-MS. For the validation of the method, we carried out recovery studies of the sample “Cornicabra 1<sup>st</sup> HD”, spiked at different concentrations, as well as the analysis of a certified reference material (cranberry SRM 3281). Recovery studies were performed for all the analyzed elements, observing recovery yields between 91% and 116%, with standard deviations lower than 8%. The results obtained in the analysis of the certified reference material was also satisfactory; the student’s t statistical test ( $p=0.05$ ) was performed, observing no significant differences between the certified and obtained values. These results, ICP-MS operating conditions and the method detection limits of each element are shown in the following Tables (S1 to S3) and Figure S1.

## Reference

1. Fernández-Poyatos, M.D.P.; Ruiz-Medina, A.; Llorent-Martínez, E.J. Phytochemical profile and mineral content of Royal variety olive fruits. Influence of the ripening stage. *J. Food Compos. Anal.* **2021**, *95*, 103671, doi:10.1016/j.jfca.2020.103671.

**Table S1.** ICP-MS operating conditions.

| Plasma conditions: Tune Parameters  |            |
|-------------------------------------|------------|
| RF Power                            | 1550 W     |
| RF Matching                         | 1.80 V     |
| Sample Depth                        | 10.0 mm    |
| Nebulizer Gas                       | 0.99 L/min |
| Gas Switch                          | Makeup Gas |
| Makeup/Dilution Gas                 | 0.00 L/min |
| Option Gas                          | 0.0 %      |
| Nebulizer Pump                      | 0.10 rps   |
| S/C Temp                            | 2 °C       |
| Plasma Gas                          | 15.0 L/min |
| Auxiliary Gas                       | 0.90 L/min |
| Torch conditions: Hardware Settings |            |
| Torch H                             | 0.1 mm     |
| Torch V                             | 0.2 mm     |

**Table S2.** Analysis of the cranberry certified reference material (NIST-3281).

| Element | Certified value <sup>a</sup><br>(mg kg <sup>-1</sup> ) | Observed value <sup>b</sup><br>(mg kg <sup>-1</sup> ) | t <sub>calc</sub> <sup>c</sup> |
|---------|--------------------------------------------------------|-------------------------------------------------------|--------------------------------|
| Ca      | 528 ± 7                                                | 503 ± 10                                              | 3.01                           |
| Cu      | 3.52 ± 0.09                                            | 3.36 ± 0.05                                           | 2.65                           |
| Fe      | 27.7 ± 0.7                                             | 25.6 ± 0.9                                            | 2.74                           |
| Mg      | 446 ± 4                                                | 453 ± 5                                               | 1.63                           |
| Mn      | 21.9 ± 0.2                                             | 21.8 ± 0.3                                            | 0.40                           |
| P       | 835 ± 17                                               | 833 ± 18                                              | 0.12                           |
| K       | 8020 ± 130                                             | 7950 ± 160                                            | 0.51                           |
| Na      | 259 ± 3                                                | 264 ± 5                                               | 1.24                           |
| Zn      | 6.9 ± 0.2                                              | 6.5 ± 0.1                                             | 3.10                           |

<sup>a</sup>n=2; <sup>b</sup>n=3; <sup>c</sup>p=0.05, t<sub>Student</sub> (theoretical value)=3.182.

Results are given as mean ± standard deviation (n=2 in certified values; n=3 in observed values).

**Table S3.** Method detection limits for the analyzed elements in ICP-MS.

| Element | MDL ( $\mu\text{g g}^{-1}$ ) | Element | MDL ( $\mu\text{g g}^{-1}$ ) |
|---------|------------------------------|---------|------------------------------|
| Ag      | 1.7                          | Mn      | 0.032                        |
| Al      | 0.82                         | Mo      | 0.004                        |
| As      | 0.002                        | Na      | 0.8                          |
| Ba      | 0.007                        | Ni      | 0.012                        |
| Ca      | 6.2                          | P       | 1.35                         |
| Cd      | 0.002                        | Pb      | 0.01                         |
| Co      | 0.006                        | Sb      | 0.004                        |
| Cr      | 0.02                         | Se      | 0.32                         |
| Cu      | 0.08                         | Sn      | 0.06                         |
| Fe      | 0.5                          | Ti      | 0.018                        |
| K       | 5                            | V       | 0.004                        |
| Mg      | 0.04                         | Zn      | 0.2                          |

**Table S4.** Digestion procedure conditions.

| Power level (W) | Power (%) | Ramp time (min) | Temperature ( °C) | Hold time ( °C) |
|-----------------|-----------|-----------------|-------------------|-----------------|
| 1600            | 100       | 5               | 100               | 7               |
| 1600            | 100       | 5               | 125               | 7               |
| 1600            | 100       | 5               | 150               | 7               |

**Table S5.** Humidity percentages of all the olive samples analyzed.

| Variety    | Season    | Humidity (%)       |                    |                    |                    |
|------------|-----------|--------------------|--------------------|--------------------|--------------------|
|            |           | 1 <sup>st</sup> HD | 2 <sup>nd</sup> HD | 3 <sup>rd</sup> HD | 4 <sup>th</sup> HD |
| Cornezuelo | 2017/2018 | -                  | 56                 | 46                 | 42                 |
|            | 2018/2019 | 60                 | 58                 | 44                 | 38                 |
| Cornicabra | 2017/2018 | -                  | 65                 | 46                 | 49                 |
|            | 2018/2019 | 68                 | 59                 | 54                 | 29                 |
| Picual     | 2017/2018 | -                  | 67                 | 49                 | 48                 |
|            | 2018/2019 | 64                 | 56                 | 39                 | 36                 |

**Table S6.** Average concentration levels of minerals and trace elements in the analyzed Cornezuelo olives in different months of two seasons; expressed in  $\mu\text{g g}^{-1}$  fresh weight. Results are given as mean  $\pm$  standard deviation (n=3).

| <i>Cornezuelo</i> | <b>2017/2018</b>               |                                |                                 | <b>2018/2019</b>                |                                |                                |                                 |
|-------------------|--------------------------------|--------------------------------|---------------------------------|---------------------------------|--------------------------------|--------------------------------|---------------------------------|
| <b>Element</b>    | <b>2<sup>nd</sup> HD</b>       | <b>3<sup>rd</sup> HD</b>       | <b>4<sup>th</sup> HD</b>        | <b>1<sup>st</sup> HD</b>        | <b>2<sup>nd</sup> HD</b>       | <b>3<sup>rd</sup> HD</b>       | <b>4<sup>th</sup> HD</b>        |
| As                | 0.26 $\pm$ 0.01 <sup>a</sup>   | 0.231 $\pm$ 0.009 <sup>b</sup> | 0.241 $\pm$ 0.004 <sup>ab</sup> | 0.113 $\pm$ 0.001 <sup>a</sup>  | 0.101 $\pm$ 0.005 <sup>a</sup> | 0.10 $\pm$ 0.01 <sup>a</sup>   | 0.108 $\pm$ 0.001 <sup>a</sup>  |
| Ba                | 0.27 $\pm$ 0.03 <sup>a</sup>   | 0.24 $\pm$ 0.03 <sup>a</sup>   | 0.25 $\pm$ 0.03 <sup>a</sup>    | -                               | -                              | -                              | -                               |
| Ca                | 620 $\pm$ 60 <sup>a</sup>      | 590 $\pm$ 50 <sup>a</sup>      | 370 $\pm$ 40 <sup>b</sup>       | 260 $\pm$ 20 <sup>b</sup>       | 350 $\pm$ 30 <sup>b</sup>      | 690 $\pm$ 70 <sup>a</sup>      | 260 $\pm$ 30 <sup>b</sup>       |
| Cd                | 0.160 $\pm$ 0.006 <sup>a</sup> | 0.145 $\pm$ 0.007 <sup>b</sup> | 0.150 $\pm$ 0.003 <sup>ab</sup> | 0.010 $\pm$ 0.001               | 0.009 $\pm$ 0.001              | Detected*                      | Detected*                       |
| Cu                | 1.68 $\pm$ 0.17 <sup>ab</sup>  | 2.0 $\pm$ 0.3 <sup>a</sup>     | 1.4 $\pm$ 0.2 <sup>b</sup>      | 1.67 $\pm$ 0.01 <sup>c</sup>    | 3.2 $\pm$ 0.1 <sup>b</sup>     | 1.9 $\pm$ 0.2 <sup>c</sup>     | 3.9 $\pm$ 0.4 <sup>a</sup>      |
| Fe                | -                              | Detected*                      | 10.0 $\pm$ 0.1                  | Detected*                       | Detected*                      | Detected*                      | Detected*                       |
| K                 | 4600 $\pm$ 400 <sup>a</sup>    | 5700 $\pm$ 400 <sup>a</sup>    | 5100 $\pm$ 600 <sup>a</sup>     | 5400 $\pm$ 300 <sup>b</sup>     | 5400 $\pm$ 100 <sup>b</sup>    | 7400 $\pm$ 100 <sup>a</sup>    | 7600 $\pm$ 200 <sup>a</sup>     |
| Mg                | 180 $\pm$ 10 <sup>a</sup>      | 132 $\pm$ 7 <sup>b</sup>       | 130 $\pm$ 20 <sup>b</sup>       | 165.8 $\pm$ 0.3 <sup>b</sup>    | 210 $\pm$ 7 <sup>a</sup>       | 210 $\pm$ 20 <sup>a</sup>      | 150 $\pm$ 10 <sup>b</sup>       |
| Mn                | 1.86 $\pm$ 0.06 <sup>a</sup>   | 1.6 $\pm$ 0.2 <sup>ab</sup>    | 1.3 $\pm$ 0.1 <sup>b</sup>      | 1.510 $\pm$ 0.003 <sup>ab</sup> | 1.7 $\pm$ 0.2 <sup>ab</sup>    | 1.8 $\pm$ 0.2 <sup>a</sup>     | 1.4 $\pm$ 0.1 <sup>b</sup>      |
| Mo                | 0.139 $\pm$ 0.005 <sup>a</sup> | 0.122 $\pm$ 0.003 <sup>b</sup> | 0.127 $\pm$ 0.006 <sup>ab</sup> | -                               | -                              | -                              | -                               |
| Na                | -                              | -                              | -                               | 5.1 $\pm$ 0.6                   | Detected*                      | Detected*                      | Detected*                       |
| Ni                | -                              | Detected*                      | -                               | 0.046 $\pm$ 0.002 <sup>b</sup>  | 0.058 $\pm$ 0.006 <sup>a</sup> | Detected*                      | 0.051 $\pm$ 0.005 <sup>ab</sup> |
| P                 | 430 $\pm$ 50 <sup>a</sup>      | 410 $\pm$ 40 <sup>a</sup>      | 330 $\pm$ 40 <sup>a</sup>       | 410 $\pm$ 20 <sup>b</sup>       | 460 $\pm$ 40 <sup>b</sup>      | 450 $\pm$ 10 <sup>b</sup>      | 600 $\pm$ 40 <sup>a</sup>       |
| Sb                | 0.088 $\pm$ 0.001 <sup>a</sup> | 0.075 $\pm$ 0.002 <sup>b</sup> | 0.078 $\pm$ 0.001 <sup>b</sup>  | 0.089 $\pm$ 0.004 <sup>a</sup>  | 0.073 $\pm$ 0.004 <sup>b</sup> | 0.071 $\pm$ 0.005 <sup>b</sup> | 0.074 $\pm$ 0.001 <sup>b</sup>  |
| Sn                | Detected*                      | Detected*                      | Detected*                       | -                               | -                              | -                              | -                               |
| Zn                | 3.7 $\pm$ 0.3 <sup>a</sup>     | 3.6 $\pm$ 0.4 <sup>a</sup>     | 2.8 $\pm$ 0.2 <sup>b</sup>      | 2.5 $\pm$ 0.1 <sup>b</sup>      | 3.2 $\pm$ 0.3 <sup>a</sup>     | 2.48 $\pm$ 0.07 <sup>b</sup>   | 2.5 $\pm$ 0.2 <sup>b</sup>      |

\*Concentrations between detection and quantitation limits.

Different superscripts (<sup>a</sup>, <sup>b</sup> and <sup>c</sup>) indicate significant differences in the extracts (p<0.05).

**Table S7.** Average concentration levels of minerals and trace elements in the analyzed Cornicabra olives in different months of two seasons; expressed in  $\mu\text{g g}^{-1}$  fresh weight. Results are given as mean  $\pm$  standard deviation (n=3).

| <i>Cornicabra</i> | 2017/2018                      |                                |                                | 2018/2019                      |                                |                                |                                |
|-------------------|--------------------------------|--------------------------------|--------------------------------|--------------------------------|--------------------------------|--------------------------------|--------------------------------|
| Element           | 2 <sup>nd</sup> HD             | 3 <sup>rd</sup> HD             | 4 <sup>th</sup> HD             | 1 <sup>st</sup> HD             | 2 <sup>nd</sup> HD             | 3 <sup>rd</sup> HD             | 4 <sup>th</sup> HD             |
| As                | 0.248 $\pm$ 0.005 <sup>a</sup> | 0.255 $\pm$ 0.007 <sup>a</sup> | 0.224 $\pm$ 0.009 <sup>b</sup> | 0.096 $\pm$ 0.003 <sup>a</sup> | 0.095 $\pm$ 0.005 <sup>a</sup> | 0.096 $\pm$ 0.002 <sup>a</sup> | 0.103 $\pm$ 0.007 <sup>a</sup> |
| Ba                | 0.94 $\pm$ 0.08 <sup>a</sup>   | 0.874 $\pm$ 0.007 <sup>a</sup> | 0.95 $\pm$ 0.09 <sup>a</sup>   | 0.80 $\pm$ 0.08 <sup>a</sup>   | 0.56 $\pm$ 0.06 <sup>b</sup>   | 0.60 $\pm$ 0.01 <sup>b</sup>   | 0.83 $\pm$ 0.06 <sup>a</sup>   |
| Ca                | 980 $\pm$ 90 <sup>a</sup>      | 590 $\pm$ 30 <sup>b</sup>      | 930 $\pm$ 30 <sup>a</sup>      | 810 $\pm$ 90 <sup>a</sup>      | 440 $\pm$ 60 <sup>c</sup>      | 627 $\pm$ 9 <sup>b</sup>       | 800 $\pm$ 60 <sup>a</sup>      |
| Cd                | 0.154 $\pm$ 0.003 <sup>a</sup> | 0.157 $\pm$ 0.004 <sup>a</sup> | 0.138 $\pm$ 0.005 <sup>b</sup> | 0.080 $\pm$ 0.002 <sup>a</sup> | 0.081 $\pm$ 0.004 <sup>a</sup> | 0.081 $\pm$ 0.006 <sup>a</sup> | 0.083 $\pm$ 0.005 <sup>a</sup> |
| Cu                | 1.7 $\pm$ 0.2 <sup>b</sup>     | 3.3 $\pm$ 0.1 <sup>a</sup>     | 1.47 $\pm$ 0.07 <sup>b</sup>   | 4.6 $\pm$ 0.4 <sup>bc</sup>    | 5.68 $\pm$ 0.04 <sup>ab</sup>  | 6.7 $\pm$ 0.8 <sup>a</sup>     | 4.1 $\pm$ 0.1 <sup>c</sup>     |
| Fe                | Detected*                      | Detected*                      | Detected*                      | 3.7 $\pm$ 0.4 <sup>b</sup>     | 2.6 $\pm$ 0.3 <sup>c</sup>     | 2.5 $\pm$ 0.3 <sup>c</sup>     | 4.9 $\pm$ 0.6 <sup>a</sup>     |
| K                 | 7000 $\pm$ 400 <sup>c</sup>    | 11400 $\pm$ 300 <sup>a</sup>   | 8800 $\pm$ 700 <sup>b</sup>    | 7200 $\pm$ 200 <sup>c</sup>    | 9000 $\pm$ 1000 <sup>b</sup>   | 7800 $\pm$ 400 <sup>bc</sup>   | 10800 $\pm$ 300 <sup>a</sup>   |
| Mg                | 132 $\pm$ 5 <sup>b</sup>       | 209 $\pm$ 2 <sup>a</sup>       | 126 $\pm$ 8 <sup>b</sup>       | 200 $\pm$ 40 <sup>a</sup>      | 170 $\pm$ 10 <sup>a</sup>      | 160 $\pm$ 20 <sup>a</sup>      | 202 $\pm$ 4 <sup>a</sup>       |
| Mn                | 1.42 $\pm$ 0.03 <sup>b</sup>   | 2.30 $\pm$ 0.04 <sup>a</sup>   | 1.7 $\pm$ 0.2 <sup>b</sup>     | 2.3 $\pm$ 0.4 <sup>ab</sup>    | 1.9 $\pm$ 0.3 <sup>b</sup>     | 2.0 $\pm$ 0.3 <sup>b</sup>     | 3.0 $\pm$ 0.4 <sup>a</sup>     |
| Mo                | 0.131 $\pm$ 0.002 <sup>b</sup> | 0.168 $\pm$ 0.009 <sup>a</sup> | 0.136 $\pm$ 0.007 <sup>b</sup> | -                              | -                              | -                              | -                              |
| Na                | -                              | -                              | -                              | Detected*                      | 3.5 $\pm$ 0.3 <sup>b</sup>     | 3.4 $\pm$ 0.3 <sup>b</sup>     | 6.30 $\pm$ 0.01 <sup>a</sup>   |
| Ni                | Detected*                      | Detected*                      | Detected*                      | 0.51 $\pm$ 0.03 <sup>a</sup>   | 0.48 $\pm$ 0.06 <sup>a</sup>   | 0.236 $\pm$ 0.006 <sup>b</sup> | 0.32 $\pm$ 0.03 <sup>b</sup>   |
| P                 | 380 $\pm$ 10 <sup>a</sup>      | 310 $\pm$ 20 <sup>b</sup>      | 200 $\pm$ 20 <sup>c</sup>      | 420 $\pm$ 30 <sup>b</sup>      | 320 $\pm$ 10 <sup>c</sup>      | 348 $\pm$ 8 <sup>bc</sup>      | 700 $\pm$ 50 <sup>a</sup>      |
| Sb                | 0.080 $\pm$ 0.001 <sup>a</sup> | 0.084 $\pm$ 0.003 <sup>a</sup> | 0.073 $\pm$ 0.003 <sup>b</sup> | -                              | -                              | -                              | -                              |
| Se                | -                              | Detected*                      | -                              | -                              | -                              | -                              | -                              |
| Sn                | Detected*                      | Detected*                      | Detected*                      | -                              | -                              | -                              | -                              |
| Ti                | -                              | -                              | -                              | 0.072 $\pm$ 0.008              | Detected*                      | Detected*                      | 0.075 $\pm$ 0.008              |
| Zn                | 2.8 $\pm$ 0.1                  | Detected*                      | 2.6 $\pm$ 0.3                  | 5.54 $\pm$ 0.08 <sup>a</sup>   | 4.9 $\pm$ 0.1 <sup>b</sup>     | 3.22 $\pm$ 0.07 <sup>d</sup>   | 3.6 $\pm$ 0.2 <sup>c</sup>     |

\*Concentrations between detection and quantitation limits.

Different superscripts (<sup>a</sup>, <sup>b</sup> and <sup>c</sup>) indicate significant differences in the extracts (p<0.05).

**Table S8.** Average concentration levels of minerals and trace elements in the analyzed Picual olives in different months of two seasons; expressed in  $\mu\text{g g}^{-1}$  fresh weight. Results are given as mean  $\pm$  standard deviation (n=3).

| <i>Picual</i> | 2017/2018                      |                                |                              | 2018/2019                      |                                |                                 |                                |
|---------------|--------------------------------|--------------------------------|------------------------------|--------------------------------|--------------------------------|---------------------------------|--------------------------------|
| Element       | 2 <sup>nd</sup> HD             | 3 <sup>rd</sup> HD             | 4 <sup>th</sup> HD           | 1 <sup>st</sup> HD             | 2 <sup>nd</sup> HD             | 3 <sup>rd</sup> HD              | 4 <sup>th</sup> HD             |
| Al            | -                              | -                              | Detected*                    | -                              | Detected*                      | -                               | Detected*                      |
| As            | 0.26 $\pm$ 0.01 <sup>a</sup>   | 0.25 $\pm$ 0.01 <sup>a</sup>   | 0.23 $\pm$ 0.03 <sup>a</sup> | 0.094 $\pm$ 0.005 <sup>a</sup> | 0.10 $\pm$ 0.01 <sup>a</sup>   | 0.097 $\pm$ 0.002 <sup>a</sup>  | 0.091 $\pm$ 0.001 <sup>a</sup> |
| Ba            | 0.54 $\pm$ 0.01 <sup>a</sup>   | 0.35 $\pm$ 0.04 <sup>b</sup>   | 0.48 $\pm$ 0.01 <sup>a</sup> | 0.099 $\pm$ 0.002 <sup>b</sup> | 0.122 $\pm$ 0.004 <sup>a</sup> | 0.106 $\pm$ 0.008 <sup>ab</sup> | 0.10 $\pm$ 0.01 <sup>b</sup>   |
| Ca            | 700 $\pm$ 80 <sup>a</sup>      | 340 $\pm$ 30 <sup>b</sup>      | 450 $\pm$ 40 <sup>b</sup>    | 277 $\pm$ 7 <sup>b</sup>       | 510 $\pm$ 40 <sup>a</sup>      | 300 $\pm$ 30 <sup>b</sup>       | 187 $\pm$ 9 <sup>c</sup>       |
| Cd            | 0.160 $\pm$ 0.009 <sup>a</sup> | 0.153 $\pm$ 0.006 <sup>a</sup> | 0.15 $\pm$ 0.02 <sup>a</sup> | 0.082 $\pm$ 0.004 <sup>a</sup> | 0.083 $\pm$ 0.009 <sup>a</sup> | 0.084 $\pm$ 0.001 <sup>a</sup>  | 0.079 $\pm$ 0.001 <sup>a</sup> |
| Cu            | 2.38 $\pm$ 0.09 <sup>c</sup>   | 2.776 $\pm$ 0.005 <sup>b</sup> | 4.35 $\pm$ 0.07 <sup>a</sup> | 3.5 $\pm$ 0.2 <sup>b</sup>     | 10 $\pm$ 1 <sup>a</sup>        | 4.0 $\pm$ 0.2 <sup>b</sup>      | 3.9 $\pm$ 0.4 <sup>b</sup>     |
| Fe            | -                              | Detected*                      | Detected*                    | Detected*                      | 2.2 $\pm$ 0.3 <sup>a</sup>     | 1.84 $\pm$ 0.07 <sup>a</sup>    | 2.5 $\pm$ 0.4 <sup>a</sup>     |
| K             | 5300 $\pm$ 100 <sup>c</sup>    | 6500 $\pm$ 500 <sup>b</sup>    | 10100 $\pm$ 400 <sup>a</sup> | 6000 $\pm$ 200 <sup>b</sup>    | 7000 $\pm$ 500 <sup>a</sup>    | 5700 $\pm$ 220 <sup>b</sup>     | 6400 $\pm$ 400 <sup>ab</sup>   |
| Mg            | 109 $\pm$ 2 <sup>b</sup>       | 110 $\pm$ 1 <sup>b</sup>       | 257 $\pm$ 4 <sup>a</sup>     | 150 $\pm$ 5 <sup>a</sup>       | 152 $\pm$ 5 <sup>a</sup>       | 119 $\pm$ 4 <sup>b</sup>        | 130 $\pm$ 10 <sup>b</sup>      |
| Mn            | 1.46 $\pm$ 0.02 <sup>b</sup>   | 1.31 $\pm$ 0.03 <sup>b</sup>   | 2.0 $\pm$ 0.2 <sup>a</sup>   | 1.33 $\pm$ 0.04 <sup>a</sup>   | 1.4 $\pm$ 0.2 <sup>a</sup>     | 1.16 $\pm$ 0.04 <sup>a</sup>    | 1.4 $\pm$ 0.2 <sup>a</sup>     |
| Mo            | 0.132 $\pm$ 0.007 <sup>a</sup> | 0.15 $\pm$ 0.01 <sup>a</sup>   | 0.13 $\pm$ 0.01 <sup>a</sup> | -                              | -                              | -                               | -                              |
| Na            | -                              | -                              | -                            | 2.9 $\pm$ 0.1 <sup>c</sup>     | 4.05 $\pm$ 0.02 <sup>a</sup>   | 3.6 $\pm$ 0.2 <sup>b</sup>      | 4.05 $\pm$ 0.06 <sup>a</sup>   |
| Ni            | Detected*                      | Detected*                      | Detected*                    | 0.18 $\pm$ 0.03 <sup>a</sup>   | 0.062 $\pm$ 0.006 <sup>b</sup> | 0.093 $\pm$ 0.009 <sup>b</sup>  | 0.074 $\pm$ 0.009 <sup>b</sup> |
| P             | 260 $\pm$ 10 <sup>b</sup>      | 274 $\pm$ 3 <sup>b</sup>       | 458 $\pm$ 3 <sup>a</sup>     | 570 $\pm$ 40 <sup>b</sup>      | 550 $\pm$ 30 <sup>b</sup>      | 380 $\pm$ 20 <sup>c</sup>       | 830 $\pm$ 90 <sup>a</sup>      |
| Sb            | 0.083 $\pm$ 0.005 <sup>a</sup> | 0.082 $\pm$ 0.004 <sup>a</sup> | 0.08 $\pm$ 0.01 <sup>a</sup> | -                              | -                              | -                               | -                              |
| Sn            | Detected*                      | Detected*                      | Detected*                    | -                              | -                              | -                               | -                              |
| Ti            | -                              | -                              | -                            | Detected*                      | Detected*                      | 0.13 $\pm$ 0.03                 | Detected*                      |
| Zn            | 2.53 $\pm$ 0.04 <sup>c</sup>   | 4.3 $\pm$ 0.4 <sup>a</sup>     | 3.2 $\pm$ 0.2 <sup>b</sup>   | 2.53 $\pm$ 0.07 <sup>a</sup>   | 1.7 $\pm$ 0.1 <sup>c</sup>     | 2.45 $\pm$ 0.03 <sup>ab</sup>   | 2.3 $\pm$ 0.1 <sup>b</sup>     |

\*Concentrations between detection and quantitation limits.

Different superscripts (<sup>a</sup>, <sup>b</sup> and <sup>c</sup>) indicate significant differences in the extracts (p<0.05).

**Figure S1.** Recovery yields with the olives of the sample “Cornicabra 1<sup>st</sup> HD”, spiked at 0.2, 10, and 20  $\mu\text{g g}^{-1}$  fresh weight.

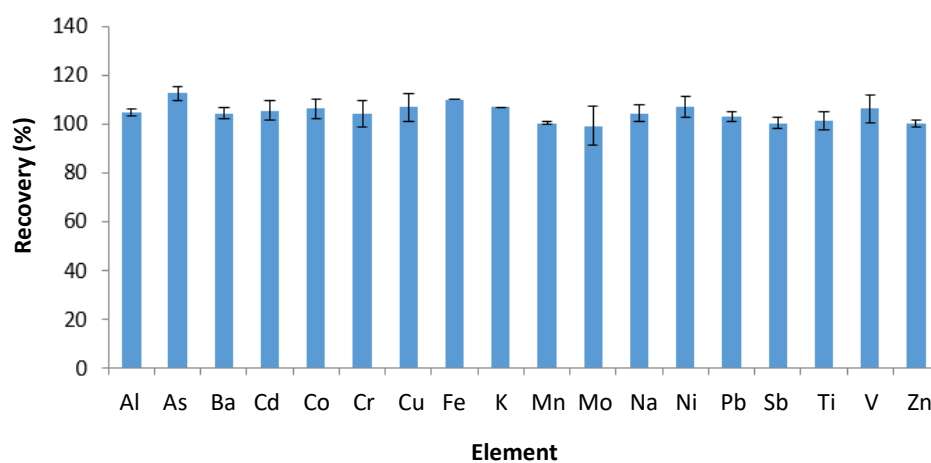

Supplement: Supplementary file 1 [file foods-10-00380-s001.pdf]
